# Supplementary material
Source: PubMed Central journal article supplement (PMC3703985)
Supplement: 1303057110_pnas.201303057SI.pdf [file 1303057110_pnas.201303057SI.pdf]

# Supporting Information

Dey et al. 10.1073/pnas.1303057110

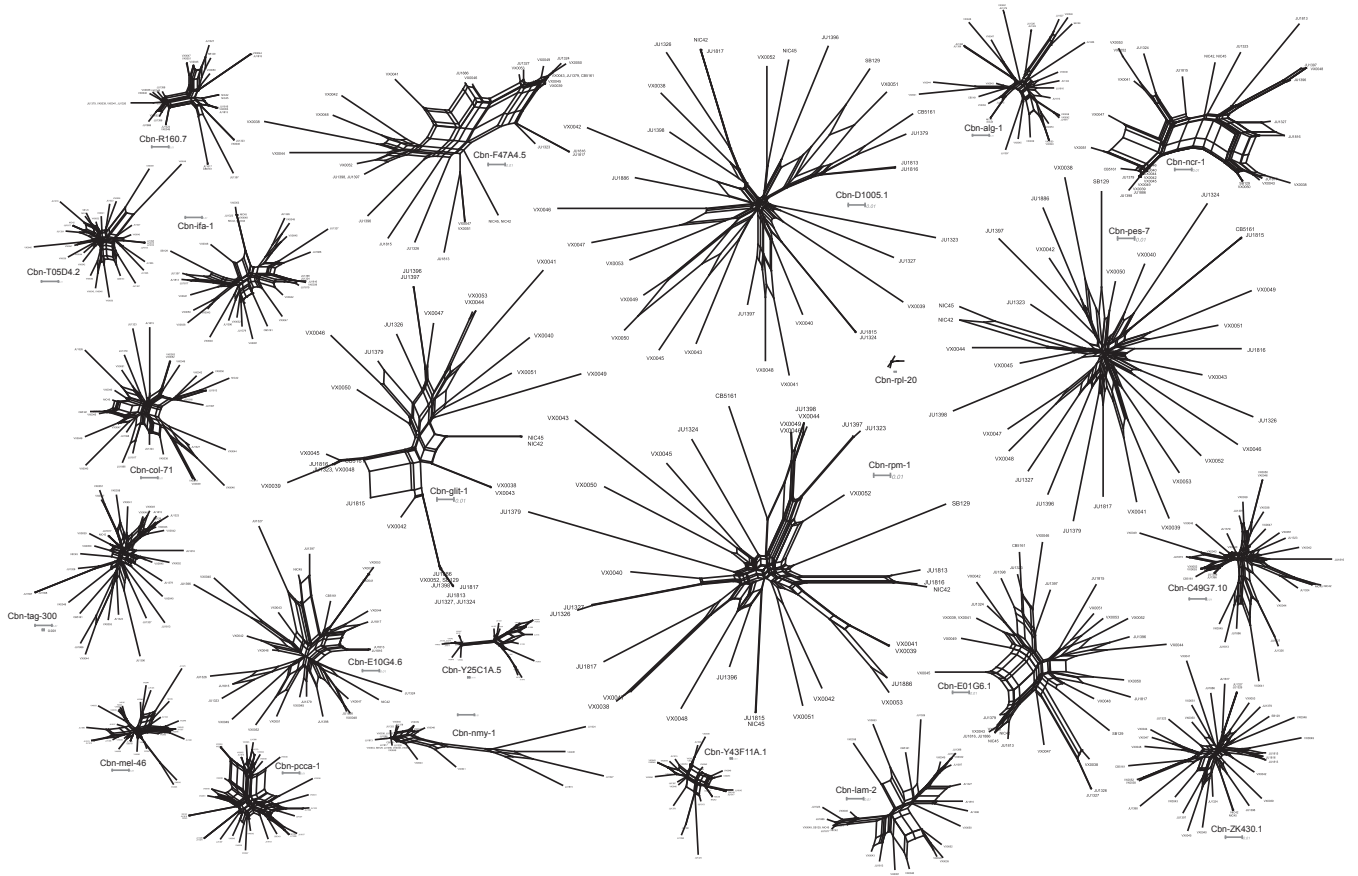

**Fig. S1.** Per-locus genealogy networks from SplitsTree4 using Jukes-Cantor distances for third codon positions (gaps excluded). Most loci exhibit extensive reticulation owing to recombination and star-shaped topologies indicative of little population substructure within a single species. All genealogical networks are shown at approximately equal scales.

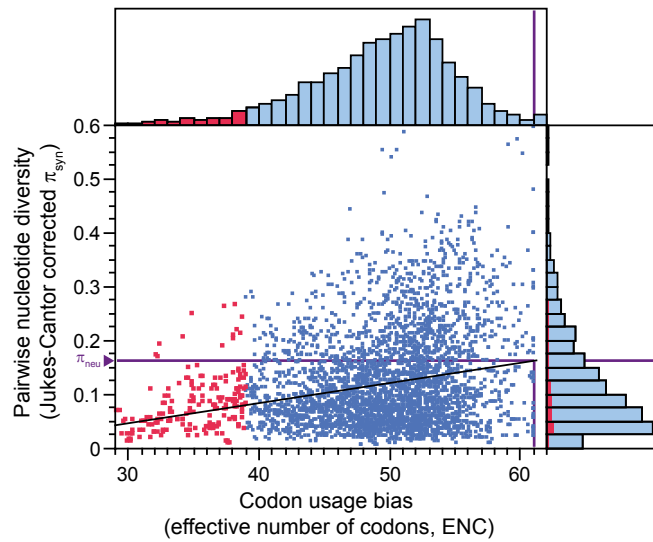

**Fig. S2.** Nucleotide diversity ( $\pi_{\text{syn-JC}}$ ) is reduced in genes with strong codon bias. Correcting for this effect provides an estimate of neutral polymorphism in the absence of translational selection on synonymous sites. The equation for the least-squares regression line (black line) was used to estimate  $\pi_{\text{neu}}$  for effective number of codons (ENC) = 61 (intersection with purple lines). Strongly biased genes (ENC  $\leq$  39) shown in red. Histograms for observed  $\pi_{\text{syn-JC}}$  and  $\pi_{\text{neu}}$  are indicated adjacent to the biplot.

**Table S1. Collection information for *Caenorhabditis breneri* isofemale strains**

| Strain | Location                                | Latitude | Longitude | Substrate                                     | Lab source/collected by      |
|--------|-----------------------------------------|----------|-----------|-----------------------------------------------|------------------------------|
| VX0038 | Shyamnagar, India (East)                | 22.819N  | 88.402E   | Rotting hibiscus                              | Alivia Dey                   |
| VX0039 | Shyamnagar, India (East)                | 22.819N  | 88.402E   | Rotting apple                                 | Alivia Dey                   |
| VX0040 | Shyamnagar, India (East)                | 22.819N  | 88.402E   | Unidentified rotten fruit                     | Alivia Dey                   |
| VX0041 | Shyamnagar, India (East)                | 22.819N  | 88.402E   | Unidentified rotten fruit                     | Alivia Dey                   |
| VX0042 | Shyamnagar, India (East)                | 22.819N  | 88.402E   | Rotting banana                                | Alivia Dey                   |
| VX0043 | Shyamnagar, India (East)                | 22.819N  | 88.402E   | Rotting carambola fruit                       | Alivia Dey                   |
| VX0044 | Shyamnagar, India (East)                | 22.819N  | 88.402E   | Rotting marigold flower                       | Alivia Dey                   |
| VX0045 | Shyamnagar, India (East)                | 22.819N  | 88.402E   | Rotting marigold flower                       | Alivia Dey                   |
| VX0046 | Garia, Calcutta, India (East)           | 22.466N  | 88.374E   | Rotting sapodilla fruit                       | Alivia Dey                   |
| VX0047 | Haridwar, India (North)                 | 29.951N  | 78.168E   | Rotting hibiscus flower                       | Alivia Dey                   |
| VX0048 | Haridwar, India (North)                 | 29.951N  | 78.168E   | Rotting hibiscus flower                       | Alivia Dey                   |
| VX0049 | Garia, Calcutta, India (East)           | 22.466N  | 88.374E   | Rotting banana                                | Alivia Dey                   |
| VX0050 | Garia, Calcutta, India (East)           | 22.466N  | 88.374E   | Rotting banana                                | Alivia Dey                   |
| VX0051 | Haridwar, India (North)                 | 29.951N  | 78.168E   | Rotting hibiscus flower                       | Alivia Dey                   |
| VX0052 | Shyamnagar, India (East)                | 22.819N  | 88.402E   | Rotting guava                                 | Alivia Dey                   |
| VX0053 | Shyamnagar, India (East)                | 22.819N  | 88.402E   | Rotting apple                                 | Alivia Dey                   |
| JU1323 | Kerala, India (South)                   | 8.309N   | 77.081E   | Rotting coconut and wood                      | (1)                          |
| JU1324 | Kerala, India (South)                   | 8.309N   | 77.081E   | Rotting pineapple                             | (1)                          |
| JU1326 | Kerala, India (South)                   | 9.6N     | 76.36E    | Rotting banana leaves and stem                | (1)                          |
| JU1327 | Kerala, India (South)                   | 9.55N    | 76.8E     | Rotting pineapples                            | (1)                          |
| JU1813 | Montabo, French Guiana                  | 4.949N   | 52.313W   | Small fruits (most likely figs)               | (2)                          |
| JU1815 | Comte river, French Guiana              | 4.6593N  | 52.3534W  | Rotten seeds/fruits                           | (2)                          |
| JU1816 | Cacao, French Guiana                    | 4.52813N | 52.5009W  | Rotten lemons                                 | (2)                          |
| JU1817 | Cacao, French Guiana                    | 4.53155N | 52.4888W  | Rotten kumquat                                | (2)                          |
| JU1379 | LaReunion                               | 21.0476S | 55.6905E  | Rotting <i>Alpinia purpurata</i> (red ginger) | (1)                          |
| JU1396 | Medellin, Colombia                      | 5.9N     | 75.9W     | Rotting noni fruit                            | (1)                          |
| JU1397 | Medellin, Colombia                      | 5.9N     | 75.9W     | Rotting orange fruit                          | (1)                          |
| JU1398 | Medellin, Colombia                      | 5.9N     | 75.9W     | Rotting orange fruit                          | (1)                          |
| JU1886 | Thailand                                | 8.03N    | 98.93E    | Unidentified rotting fruit                    | Isolated by Marie-Anne Felix |
| NIC 42 | Nouragues Forest Station, French Guiana | 4.08788N | 52.68W    | Figs                                          | (1)                          |
| NIC 45 | Nouragues Forest Station, French Guiana | 4.08788N | 52.68W    | Figs                                          | (1)                          |
| CB5161 | Trinidad                                |          |           | Sugar cane                                    | CGC                          |
| SB129  | Bohrok, Sumatra                         |          |           | Banana plants                                 | CGC                          |

CGC, *Caenorhabditis* Genetics Center.

1. Kiontke KC, et al. (2011) A phylogeny and molecular barcodes for *Caenorhabditis* with numerous new species from rotting fruits. *BMC Evol Biol* 11(1):339.
2. Felix M-A, et al. (2013) Species richness, distribution and genetic diversity of *Caenorhabditis* nematodes in a remote tropical rainforest. *BMC Evol Biol* 13(1):10.

**Table S2. Primer sequences used for each locus**

| Gene name               | Primer ID         | Forward primer         | Reverse primer        | Length amplified (bp) | Length retained (bp) | Strains sequenced |
|-------------------------|-------------------|------------------------|-----------------------|-----------------------|----------------------|-------------------|
| <i>Cbn-tag-300</i>      | p11               | ACGGTATGTGGAGTGAACGG   | TCGGCGGCTGTGAGAGCAAT  | 698                   | 663                  | 33                |
| <i>Cbn-pes-7</i>        | p12               | GCTCATCGTGACAAGACCGT   | GCAAACATCGCCACCGTCTG  | 719                   | 645                  | 32                |
| <i>Cbn-Y25C1A.5</i>     | p15               | CAGACTGCCGACACTCTTCA   | CTCCAAGGGTTAGACACATGC | 856                   | 546                  | 31                |
| <i>Cbn-E01G4.6</i>      | p17               | GAGTTCCATTCTTCGTCCA    | TATCTTCCATGGCGACCAAT  | 867                   | 635                  | 30                |
| <i>Cbn-R160.7</i>       | p18               | CTGACGAGGAGAAGGCAAAG   | GGCGCCTTGACACTTTCTAC  | 666                   | 456                  | 33                |
| <i>Cbn-Y43F11A.1</i>    | p21               | TGGAATCCAAAGAGTTCAAAGA | ACCGATCCATTTGGAGATGA  | 803                   | 497                  | 29                |
| <i>Cbn-D1005.1exon5</i> | p22*              | CGAAGATGACACCAAAGCAA   | AACGGGAGACGTAGGCAAC   | 748                   | 1,113                | 32                |
| <i>Cbn-D1005.1exon6</i> | p86*              | GAATCAAGCCAGGAGCATTTC  | ATCCAAAACCTCTCCGATT   | 741                   | 1,113                | 32                |
| <i>Cbn-col-71</i>       | p22a              | GTAAGTGTGATACCGAGGG    | GGCTCTTCTTCTTCCAT     | 564                   | 529                  | 32                |
| <i>Cbn-ZK430.1</i>      | p24 <sup>†</sup>  | TATCCCGTTTTCTCAATCG    | TCGTCTGACGTCCACAAG    | 709                   | 585                  | 33                |
| <i>Cbn-ZK430.1</i>      | p24a <sup>†</sup> | GATTGCTCCTCGGACTCTGC   | AGACCTCCTGCTCACCTTC   | 721                   | 585                  | 33                |
| <i>Cbn-ZK430.1</i>      | p24b <sup>†</sup> | TTGCTCCTCGGACTCTGCGT   | CCTACGCTCCGAAACTCTTA  | 624                   | 585                  | 33                |
| <i>Cbn-T05D4.2</i>      | p31               | AAAAGTTGAAGAGCTTCGGAAA | ATGGGGAGTCCACACCAAT   | 658                   | 475                  | 31                |
| <i>Cbn-lam-2</i>        | p35               | GGAACCGAGGAAGATTGTCA   | GAAGTGGTATGGAGCGCATT  | 624                   | 590                  | 30                |
| <i>Cbn-ncr-1</i>        | p37               | CAGCCGATGTACAGAAAAC    | CCAGCCATAACCATTCCAAC  | 650                   | 614                  | 32                |
| <i>Cbn-rpl-20</i>       | p41               | ATGCCAACCAAGGCTCTCGG   | ACGATGTGGGAGTGGGAAGC  | 528                   | 493                  | 33                |
| <i>Cbn-pcca-1</i>       | p42               | CTACGTCATCCGTGGAGTCA   | CAGCTTGCTCTGGAAGAACC  | 545                   | 522                  | 33                |
| <i>Cbn-mel-46</i>       | p42a              | GCCAACACGGGAGAAAGCCA   | TTCTTCCGCTCATCTTGC    | 643                   | 606                  | 31                |
| <i>Cbn-nmy-1</i>        | p44               | AGTTAGCCACCGCAAGAAGA   | CGTTGGCTCTTCTCATCC    | 743                   | 706                  | 27                |
| <i>Cbn-glit-1</i>       | p45               | GTCCAGTGCCGATGCTTATT   | CAGGGCTGGAATGTACTCGT  | 722                   | 691                  | 33                |
| <i>Cbn-C49G7.10</i>     | p51               | CTGGGATACCGATTTTACAG   | AGTGCATGAGTGCAACAAC   | 701                   | 477                  | 31                |
| <i>Cbn-rpm-1</i>        | p52               | ACGGTGAAGCCCTTAACGGT   | GCCTACTCCTCTGGTTGGTT  | 652                   | 622                  | 33                |
| <i>Cbn-ifa-1</i>        | p81               | AAGGGTCGTGAACAAGATCG   | CGACAAGTTGCTTGAGTCCA  | 799                   | 754                  | 33                |
| <i>Cbn-F47A4.5</i>      | p89               | ATCATGGCTGTTTGGCTAC    | TTGTCTTGATCTGGCGACTG  | 630                   | 593                  | 32                |
| <i>Cbn-alg-1</i>        | p92               | CACCACTCCAAACCTTT      | GAGCCTTCTCCAGAGTCGTG  | 822                   | 782                  | 33                |
| <i>Cbn-E01G6.1</i>      | p94               | CAAGAGTGCAACTTCTGTTCA  | GGTCAATGTTCTTGGCTGGT  | 637                   | 601                  | 33                |

\*Primers p22 and p86 were used for the fragment of *Cbn-D1005.1*.

<sup>†</sup>Primers p24, p24a, and p24b were used for the fragment of *Cbn-ZK430.1*

**Table S3. Nucleotide diversity and variant frequency spectrum summaries for pooled, scattered, and local samples of *C. brenneri***

| Locus                | Pooled sampling scheme |                       |                      |                                     | Scattered sampling scheme |                       |                      |                                     | Local sampling scheme (Shyamnagar) |                       |                      |                                     |
|----------------------|------------------------|-----------------------|----------------------|-------------------------------------|---------------------------|-----------------------|----------------------|-------------------------------------|------------------------------------|-----------------------|----------------------|-------------------------------------|
|                      | $\pi_{\text{syn-JC}}$  | $\pi_{\text{rep-JC}}$ | $D_{\text{Taj-syn}}$ | $D_{\text{Taj-syn}}/D_{\text{min}}$ | $\pi_{\text{syn-JC}}$     | $\pi_{\text{rep-JC}}$ | $D_{\text{Taj-syn}}$ | $D_{\text{Taj-syn}}/D_{\text{min}}$ | $\pi_{\text{syn-JC}}$              | $\pi_{\text{rep-JC}}$ | $D_{\text{Taj-syn}}$ | $D_{\text{Taj-syn}}/D_{\text{min}}$ |
| <i>Cbn-tag-300</i>   | 0.1047                 | 0.00081               | -1.349               | -0.421                              | 0.1053                    | 0.00099               | -1.185               | -0.403                              | 0.0973                             | 0.00041               | -0.732               | -0.230                              |
| <i>Cbn-pes-7</i>     | 0.2841                 | 0.00293               | -1.138               | -0.213                              | 0.2959                    | 0.00359               | -0.857               | -0.043                              | 0.2543                             | 0.00284               | -0.622               | 0.083                               |
| <i>Cbn-Y25C1A.5</i>  | 0.0424                 | 0.00000               | -0.733               | -0.256                              | 0.0471                    | 0.00000               | -0.313               | -0.087                              | 0.0314                             | 0.00000               | -0.021               | 0.043                               |
| <i>Cbn-E01G4.6</i>   | 0.1488                 | 0.00996               | -0.360               | -0.003                              | 0.1495                    | 0.01039               | -0.262               | 0.074                               | 0.1273                             | 0.00730               | -0.175               | 0.137                               |
| <i>Cbn-R160.7</i>    | 0.0762                 | 0.00759               | -0.340               | -0.065                              | 0.0851                    | 0.00832               | -0.296               | -0.031                              | 0.0659                             | 0.00507               | -0.574               | -0.207                              |
| <i>Cbn-Y43F11A.1</i> | 0.0486                 | 0.01214               | -0.879               | -0.306                              | 0.0467                    | 0.01316               | -0.679               | -0.264                              | 0.0360                             | 0.00803               | -1.059               | -0.530                              |
| <i>Cbn-D1005.1</i>   | 0.2933                 | 0.00170               | -0.573               | 0.039                               | 0.2852                    | 0.00200               | -0.462               | 0.146                               | 0.3007                             | 0.00204               | -0.293               | 0.452                               |
| <i>Cbn-col-71</i>    | 0.0830                 | 0.00027               | -1.080               | -0.338                              | 0.0905                    | 0.00016               | -0.728               | -0.218                              | 0.0859                             | 0.00031               | -0.103               | 0.086                               |
| <i>Cbn-ZK430.1</i>   | 0.1793                 | 0.00529               | -0.629               | -0.085                              | 0.1716                    | 0.00539               | -0.560               | -0.046                              | 0.1902                             | 0.00503               | 0.328                | 0.523                               |
| <i>Cbn-T05D4.2</i>   | 0.0998                 | 0.02050               | -0.930               | -0.276                              | 0.0938                    | 0.01711               | -0.508               | -0.118                              | 0.0809                             | 0.02233               | -0.827               | -0.315                              |
| <i>Cbn-lam-2</i>     | 0.1469                 | 0.00075               | -0.427               | -0.032                              | 0.1462                    | 0.00076               | -0.076               | 0.163                               | 0.1561                             | 0.00144               | -0.041               | 0.275                               |
| <i>Cbn-ncr-1</i>     | 0.1345                 | 0.00071               | -0.226               | 0.036                               | 0.1399                    | 0.00085               | -0.378               | 0.005                               | 0.1047                             | 0.00075               | 0.168                | 0.263                               |
| <i>Cbn-rpl-20</i>    | 0.0060                 | 0.00033               | -1.516               | -0.736                              | 0.0041                    | 0.00109               | -1.353               | -0.839                              | 0.0109                             | 0.00163               | -0.326               | -0.181                              |
| <i>Cbn-pcca-1</i>    | 0.1046                 | 0.00469               | -0.210               | 0.014                               | 0.1020                    | 0.00436               | 0.091                | 0.167                               | 0.1017                             | 0.00514               | -0.144               | 0.090                               |
| <i>Cbn-mel-46</i>    | 0.0999                 | 0.00552               | -1.227               | -0.382                              | 0.1076                    | 0.00593               | -0.890               | -0.276                              | 0.0939                             | 0.00423               | -0.736               | -0.239                              |
| <i>Cbn-nmy-1</i>     | 0.0733                 | 0.00034               | -1.633               | -0.561                              | 0.0990                    | 0.00015               | -1.129               | -0.404                              | 0.0346                             | 0.00067               | -1.620               | -0.879                              |
| <i>Cbn-glit-1</i>    | 0.2504                 | 0.00254               | 0.054                | 0.259                               | 0.2217                    | 0.00252               | 0.188                | 0.378                               | 0.2689                             | 0.00237               | -0.024               | 0.485                               |
| <i>Cbn-C49G7.10</i>  | 0.1190                 | 0.01339               | -1.174               | -0.353                              | 0.1246                    | 0.01241               | -0.641               | -0.142                              | 0.1066                             | 0.01315               | -0.722               | -0.216                              |
| <i>Cbn-rpm-1</i>     | 0.4333                 | 0.00336               | -0.155               | 0.355                               | 0.4522                    | 0.00330               | -0.068               | 0.602                               | 0.4096                             | 0.00367               | 0.040                | 0.870                               |
| <i>Cbn-ifa-1</i>     | 0.1051                 | 0.00077               | -0.667               | -0.160                              | 0.1104                    | 0.00073               | -0.626               | -0.146                              | 0.1125                             | 0.00081               | -0.189               | 0.086                               |
| <i>Cbn-F47A4.5</i>   | 0.1657                 | 0.00071               | -0.314               | 0.029                               | 0.1621                    | 0.00058               | -0.318               | 0.061                               | 0.1766                             | 0.00044               | 0.202                | 0.422                               |
| <i>Cbn-alg-1</i>     | 0.0972                 | 0.00000               | -0.953               | -0.274                              | 0.0991                    | 0.00000               | -0.965               | -0.308                              | 0.0900                             | 0.00000               | -0.114               | 0.088                               |
| <i>Cbn-E01G6.1</i>   | 0.1554                 | 0.00144               | -0.602               | -0.095                              | 0.1538                    | 0.00135               | -0.317               | 0.046                               | 0.1555                             | 0.00140               | -0.559               | -0.048                              |
| Mean                 | 0.1414                 | 0.0042                | -0.742               | -0.166                              | 0.1432                    | 0.00414               | -0.536               | -0.073                              | 0.1344                             | 0.00387               | -0.354               | 0.046                               |

**Table S4. Numbers of monomorphic and polymorphic sites for each locus in the globally pooled sample of *C. brenneri***

| Locus                | Monomorphic sites* | Dimorphic SNPs* | Trimorphic SNPs* | Tetramorphic SNPs* |
|----------------------|--------------------|-----------------|------------------|--------------------|
| <i>Cbn-tag-300</i>   | 588                | 80              | 13               | 0                  |
| <i>Cbn-pes-7</i>     | 487                | 154             | 33               | 3                  |
| <i>Cbn-Y25C1A.5</i>  | 526                | 27              | 1                | 0                  |
| <i>Cbn-E01G4.6</i>   | 545                | 99              | 8                | 1                  |
| <i>Cbn-R160.7</i>    | 413                | 44              | 1                | 0                  |
| <i>Cbn-Y43F11A.1</i> | 452                | 60              | 2                | 0                  |
| <i>Cbn-D1005.1</i>   | 853                | 198             | 36               | 4                  |
| <i>Cbn-col-71</i>    | 476                | 63              | 5                | 1                  |
| <i>Cbn-ZK430.1</i>   | 496                | 94              | 13               | 2                  |
| <i>Cbn-T05D4.2</i>   | 385                | 101             | 4                | 0                  |
| <i>Cbn-lam-2</i>     | 517                | 71              | 4                | 0                  |
| <i>Cbn-ncr-1</i>     | 549                | 58              | 7                | 1                  |
| <i>Cbn-rpl-20</i>    | 487                | 11              | 0                | 0                  |
| <i>Cbn-pcca-1</i>    | 467                | 55              | 2                | 0                  |
| <i>Cbn-mel-46</i>    | 537                | 86              | 12               | 0                  |
| <i>Cbn-nmy-1</i>     | 639                | 67              | 1                | 0                  |
| <i>Cbn-glit-1</i>    | 573                | 116             | 4                | 1                  |
| <i>Cbn-C49G7.10</i>  | 401                | 87              | 4                | 0                  |
| <i>Cbn-rpm-1</i>     | 473                | 127             | 33               | 5                  |
| <i>Cbn-ifa-1</i>     | 681                | 70              | 3                | 0                  |
| <i>Cbn-F47A4.5</i>   | 515                | 67              | 11               | 0                  |
| <i>Cbn-alg-1</i>     | 699                | 76              | 7                | 0                  |
| <i>Cbn-E01G6.1</i>   | 516                | 78              | 7                | 0                  |
| Mean                 | 12,275             | 1,889           | 211              | 18                 |

\*Maximum observed across 1,000 randomized haplotype samples per locus.

**Table S5. Per-locus recombination estimates ( $\rho = 4N_e c$ ,  $R_{\min}$ ) for scattered and local samples of *C. breneri***

| Locus                | Scattered sampling scheme |            | Local sampling scheme (Shyamnagar) |            |
|----------------------|---------------------------|------------|------------------------------------|------------|
|                      | $\rho$                    | $R_{\min}$ | $\rho$                             | $R_{\min}$ |
| <i>Cbn-tag-300</i>   | 0.136                     | 10         | 0.108                              | 15         |
| <i>Cbn-pes-7</i>     | 0.155                     | 30         | 0.155                              | 43         |
| <i>Cbn-Y25C1A.5</i>  | 0.018                     | 2          | 0.031                              | 3          |
| <i>Cbn-E01G4.6</i>   | 0.157                     | 18         | 0.084                              | 25         |
| <i>Cbn-R160.7</i>    | 0.058                     | 6          | 0.011                              | 9          |
| <i>Cbn-Y43F11A.1</i> | 0.098                     | 4          | 0.055                              | 8          |
| <i>Cbn-D1005.1</i>   | 0.089                     | 51         | 0.090                              | 65         |
| <i>Cbn-col-71</i>    | 0.127                     | 9          | 0.108                              | 16         |
| <i>Cbn-ZK430.1</i>   | 0.161                     | 19         | 0.171                              | 24         |
| <i>Cbn-T05D4.2</i>   | 0.155                     | 11         | 0.167                              | 13         |
| <i>Cbn-lam-2</i>     | 0.036                     | 10         | 0.116                              | 14         |
| <i>Cbn-ncr-1</i>     | 0.055                     | 13         | 0.003                              | 19         |
| <i>Cbn-rpl-20</i>    | 0.105                     | 0          | 0.045                              | 0          |
| <i>Cbn-pcca-1</i>    | 0.083                     | 11         | 0.123                              | 15         |
| <i>Cbn-mel-46</i>    | 0.071                     | 9          | 0.066                              | 14         |
| <i>Cbn-nmy-1</i>     | 0.003                     | 7          | 0.000                              | 13         |
| <i>Cbn-glit-1</i>    | 0.023                     | 20         | 0.048                              | 35         |
| <i>Cbn-C49G7.10</i>  | 0.142                     | 12         | 0.155                              | 22         |
| <i>Cbn-rpm-1</i>     | 0.149                     | 29         | 0.125                              | 37         |
| <i>Cbn-ifa-1</i>     | 0.074                     | 13         | 0.082                              | 17         |
| <i>Cbn-F47A4.5</i>   | 0.070                     | 11         | 0.007                              | 17         |
| <i>Cbn-alg-1</i>     | 0.104                     | 10         | 0.128                              | 19         |
| <i>Cbn-E01G6.1</i>   | 0.072                     | 11         | 0.073                              | 17         |
| Mean                 | 0.093                     | 13.7       | 0.085                              | 20.0       |

Median observed across 1,000 randomized haplotype samples per locus.

**Table S6. Genetic differentiation per locus between strains from Shyamnagar (eastern India) and French Guiana**

| Locus                | $N_{st}$ | $F_{st}$ | $D_{xy}$ | Fixed differences | Polymorphic in French Guiana, monomorphic in Shyamnagar | Polymorphic in Shyamnagar, monomorphic in French Guiana | Shared variants | Significance ( $K_{st}^*$ ) |
|----------------------|----------|----------|----------|-------------------|---------------------------------------------------------|---------------------------------------------------------|-----------------|-----------------------------|
| <i>Cbn-tag-300</i>   | 0.008    | 0.008    | 0.019    | 0                 | 12                                                      | 24                                                      | 15              | NS                          |
| <i>Cbn-pes-7</i>     | 0.073    | 0.071    | 0.053    | 0                 | 29                                                      | 70                                                      | 35              | 0.01 < $P$ < 0.05           |
| <i>Cbn-Y25C1A.5</i>  | 0.194    | 0.194    | 0.011    | 0                 | 4                                                       | 2                                                       | 6               | 0.01 < $P$ < 0.05           |
| <i>Cbn-E01G4.6</i>   | 0.117    | 0.116    | 0.035    | 0                 | 16                                                      | 26                                                      | 27              | 0.01 < $P$ < 0.05           |
| <i>Cbn-R160.7</i>    | 0.189    | 0.188    | 0.020    | 0                 | 4                                                       | 8                                                       | 15              | 0.01 < $P$ < 0.05           |
| <i>Cbn-Y43F11A.1</i> | 0.232    | 0.231    | 0.017    | 0                 | 10                                                      | 12                                                      | 6               | 0.001 < $P$ < 0.01          |
| <i>Cbn-D1005.1</i>   | 0.065    | 0.065    | 0.055    | 0                 | 23                                                      | 100                                                     | 85              | 0.01 < $P$ < 0.05           |
| <i>Cbn-col-71</i>    | 0.038    | 0.038    | 0.022    | 0                 | 10                                                      | 18                                                      | 12              | NS                          |
| <i>Cbn-ZK430.1</i>   | 0.056    | 0.057    | 0.036    | 0                 | 6                                                       | 35                                                      | 31              | 0.01 < $P$ < 0.05           |
| <i>Cbn-T05D4.2</i>   | 0.159    | 0.158    | 0.028    | 0                 | 6                                                       | 37                                                      | 10              | $P$ < 0.001                 |
| <i>Cbn-lam-2</i>     | 0.156    | 0.156    | 0.029    | 0                 | 8                                                       | 33                                                      | 15              | 0.01 < $P$ < 0.05           |
| <i>Cbn-ncr-1</i>     | 0.180    | 0.179    | 0.031    | 0                 | 21                                                      | 15                                                      | 21              | 0.001 < $P$ < 0.01          |
| <i>Cbn-rpl-20</i>    | 0.175    | 0.175    | 0.003    | 0                 | 0                                                       | 5                                                       | 1               | 0.01 < $P$ < 0.05           |
| <i>Cbn-pcca-1</i>    | 0.157    | 0.156    | 0.030    | 0                 | 5                                                       | 17                                                      | 21              | 0.01 < $P$ < 0.05           |
| <i>Cbn-mel-46</i>    | 0.100    | 0.100    | 0.020    | 0                 | 8                                                       | 34                                                      | 9               | 0.01 < $P$ < 0.05           |
| <i>Cbn-nmy-1</i>     | -0.082   | -0.082   | 0.013    | 0                 | 17                                                      | 10                                                      | 11              | NS                          |
| <i>Cbn-glit-1</i>    | 0.043    | 0.042    | 0.045    | 0                 | 9                                                       | 48                                                      | 44              | NS                          |
| <i>Cbn-C49G7.10</i>  | 0.092    | 0.091    | 0.036    | 0                 | 14                                                      | 27                                                      | 18              | 0.01 < $P$ < 0.05           |
| <i>Cbn-rpm-1</i>     | 0.084    | 0.086    | 0.067    | 0                 | 15                                                      | 61                                                      | 56              | 0.01 < $P$ < 0.05           |
| <i>Cbn-ifa-1</i>     | -0.047   | -0.046   | 0.019    | 0                 | 2                                                       | 22                                                      | 24              | NS                          |
| <i>Cbn-F47A4.5</i>   | 0.016    | 0.020    | 0.037    | 0                 | 17                                                      | 27                                                      | 31              | 0.01 < $P$ < 0.05           |
| <i>Cbn-alg-1</i>     | 0.038    | 0.039    | 0.017    | 0                 | 5                                                       | 26                                                      | 17              | NS                          |
| <i>Cbn-E01G6.1</i>   | 0.083    | 0.083    | 0.028    | 0                 | 10                                                      | 41                                                      | 17              | NS                          |
| Mean                 | 0.092    | 0.092    | 0.029    | 0                 | 251                                                     | 698                                                     | 527             |                             |

Significance ( $K_{st}^*$ ) was not adjusted for multiple tests. NS, not significant.

**Table S7. Codon use bias metrics and estimates of selection on preferred codons for each locus**

| Locus                | $F_{op}$ * | ENC    | Selection intensity for preferred codons <sup>†</sup> |        |        |
|----------------------|------------|--------|-------------------------------------------------------|--------|--------|
|                      |            |        | $4N_{es}$                                             | $-2Ln$ | $+2Ln$ |
| <i>Cbn-tag-300</i>   | 0.530      | 48.84  | 1.0250                                                | 0.26   | 1.86   |
| <i>Cbn-pes-7</i>     | 0.391      | 54.18  | 0.7500                                                | 0.09   | 1.45   |
| <i>Cbn-Y25C1A.5</i>  | 0.454      | 47.01  | 0.8500                                                | -0.78  | 2.76   |
| <i>Cbn-E01G4.6</i>   | 0.528      | 35.91  | 0.2375                                                | -0.56  | 1.05   |
| <i>Cbn-R160.7</i>    | 0.349      | 59.54  | 0.6500                                                | -0.57  | 2.03   |
| <i>Cbn-Y43F11A.1</i> | 0.415      | 55.30  | 0.4625                                                | -1.09  | 2.16   |
| <i>Cbn-D1005.1</i>   | 0.518      | 40.42  | 1.7250                                                | 0.76   | 2.89   |
| <i>Cbn-col-71</i>    | 0.809      | 30.39  | 0.1250                                                | -0.30  | 0.55   |
| <i>Cbn-ZK430.1</i>   | 0.443      | 44.28  | -0.4625                                               | -1.34  | 0.36   |
| <i>Cbn-T05D4.2</i>   | 0.268      | 54.30  | 0.5125                                                | -0.78  | 1.90   |
| <i>Cbn-lam-2</i>     | 0.559      | 39.30  | 0.2750                                                | -0.46  | 1.03   |
| <i>Cbn-ncr-1</i>     | 0.473      | 47.25  | 0.7000                                                | -0.10  | 1.55   |
| <i>Cbn-rpl-20</i>    | 0.742      | 38.70  | -0.1875                                               | -4.28  | 3.59   |
| <i>Cbn-pcca-1</i>    | 0.720      | 38.49  | 0.1625                                                | -0.84  | 1.19   |
| <i>Cbn-mel-46</i>    | 0.434      | 54.52  | 0.6125                                                | -0.27  | 1.56   |
| <i>Cbn-nmy-1</i>     | 0.501      | 45.46  | 0.5500                                                | -0.32  | 1.48   |
| <i>Cbn-glit-1</i>    | 0.478      | 55.00  | 0.6000                                                | -0.15  | 1.39   |
| <i>Cbn-C49G7.10</i>  | 0.384      | 35.76  | -0.0250                                               | -0.96  | 0.90   |
| <i>Cbn-rpm-1</i>     | 0.431      | 56.93  | 0.0250                                                | -0.59  | 0.63   |
| <i>Cbn-ifa-1</i>     | 0.703      | 33.22  | 0.9500                                                | 0.18   | 1.79   |
| <i>Cbn-F47A4.5</i>   | 0.445      | 50.77  | 0.4750                                                | -0.36  | 1.35   |
| <i>Cbn-alg-1</i>     | 0.606      | 43.01  | 0.0125                                                | -0.74  | 0.78   |
| <i>Cbn-E01G6.1</i>   | 0.531      | 40.38  | 0.3125                                                | -0.38  | 1.01   |
| Mean                 | 0.509      | 45.608 |                                                       |        |        |
| MLE for all loci     |            |        | 0.4125                                                | 0.25   | 0.575  |

MLE, Maximum likelihood estimate.

\**Caenorhabditis elegans* codon table.

<sup>†</sup>Based on analysis of a scattered sample.
